# Supplementary material for: Compartmental Schiff-base ligands as selective double-loaded extractants for copper(ii)Electronic supplementary information (ESI) available: synthetic and spectroscopic data. See http://www.rsc.org/suppdata/cc/b1/b109635b/
Source: Royal Society of Chemistry journal article supplement (doi:10.1039/b109635b), 2002-01-23
Supplement: b109635b.doc [file b109635b.doc]

# SUPPLEMENTARY INFORMATION FOR DEPOSITION

Metal ion concentrations were determined using a Varian Spectra AA-880 atomic adsorption spectrometer

**Synthesis of [H4L](PF6)2**

To a solution of 2,6-diformyl-4-*tert*-butylphenol (0.247g, 1.20mmol) in MeOH (150cm3) was added 1,3-diaminopropane (0.10cm3, 1.20mmol) followed by HBr (0.15cm3, 48% solution). The solution was brought to reflux and after 10 mins had turned orange. Refluxing was continued for a further 1.5 h. Cooling to room temperature followed by the addition of NH4PF6 (0.215g, 1.32mmol) caused the immediate precipitation of an orange solid. This was collected by filtration, washed with Et2O and dried under suction; 0.145g, 31%. Found: C, 46.70; H, 5.80; N, 8.27%. [C30H42N4O2](PF6)2.MeCN requires: C, 46.77; H, 5.48; N, 8.53%. FAB MS (3-NOBA): m/z 489, [C30H41N4O2]+; 635, {[C30H42N4O2](PF6)}+; 803, {[C30H42N4O2](PF6)2+Na}+. 1H NMR (250.13MHz, CD3NO2, 298K): δ=1.18 (18H, s, C(CH3)3), 2.56 ( 4H, m, CH2CH2CH2), 4.19 (8H, q, CH2CH2CH2), 7.63 (4H, s, aromatic CH), 8.42 (4H, d, C(N)H), 13.75ppm (2H, br s, NH). 13C DEPT NMR (62.90MHz, CD3NO2, 298K): δ=26.53 (CH2CH2CH2), 28.99 (C(CH3)3), 32.44 (C(CH3)3), 50.87 (CH2CH2CH2), 115.45, 136.35 (aromatic quaternary), 141.99 (aromatic CH), 167.34 (C(N)H), 176.23ppm (aromatic quaternary). IR (KBr disc): 3674w, 3588w, 2959m, 2878w, 1670vs, 1651vs, 1534vs, 1460m, 1421w, 1399w, 1367m, 1346m, 1286w, 1248s, 1120m, 1076w, 1027m, 1005m, 911w, 832vs, 740w, 676w, 615w, 557vs, 471w, 416w cm-1.

Crystals suitable for X-ray diffraction studies were grown by vapour diffusion of diethyl ether into a MeCN solution of [H4L](PF6)2 at room temperature.

**Synthesis of (H2L)**

A solution of Et3N (0.3cm3, 2.23mmol) in MeCN (10cm3) was added slowly dropwise to a solution of [H4L](PF6)2 (0.3415g, 0.44mmol) in MeCN (25cm3). The solution was stirred vigorously throughout the addition during which time the solution lightened in colour from orange to yellow and a yellow solid precipitated. The suspension was stirred at room temperature for 2 h. The solid was collected, washed with diethyl ether and dried under suction; 0.1270g, 59%. Found: C, 73.97; H, 8.52; N, 11.43%; also found C, 73.37; H, 8.42; N, 11.32%. C30H40N4O2 requires: C, 73.77; H, 8.20; N, 11.48%. EI MS: m/z 488 (100%), [C30H40N4O2]+. 1H NMR (300.13MHz, CDCl3, 298K): δ=1.33 (18H, br s, C(CH3)3), 2.18 (4H, br s, CH2CH2CH2), 3.77 (8H, br t, CH2CH2CH2), 7.70 (4H, br s, aromatic CH), 8.62ppm (4H, br s, C(N)H). IR (KBr disc): 3422w, 2954vs, 2868s, 1639vs, 1598s, 1464vs, 1363s, 1305w, 1283m, 1263m, 1234m, 1122w, 1030w, 1003w, 975w, 885w, 825w, 760w, 707w, 637w, 516w cm-1.

# Synthesis of [Cu2(L)(MeCN)2](PF6)2

To a solution of [H4L](PF6)2 (0.2641g, 0.34mmol) in MeCN (31cm3) was added a solution of Cu(OAc)2.H2O (0.1345g, 0.67mmol) in warm EtOH (20cm3). After the addition of triethylamine (0.25cm3, 1.79mmol) the dark green solution was refluxed for 21 h. The addition of Et2O to the concentrated filtrate precipitated a pale green solid. This was collected, washed with diethyl ether and dried under suction; 0.2479g, 74%. The product was recrystallised from MeCN/diethyl ether. Found: C, 40.00; H, 4.46; N, 7.58%. [Cu2C34H44N6O2](PF6)2 requires: C, 41.42; H, 4.47; N, 8.53%. FAB MS (3-NOBA): m/z 757, {[Cu2C30H38N4O2](PF6)}+; 612, [Cu2C30H38N4O2]+. IR (KBr disc): 3629w, 3422br w, 2958m, 2867w, 1641vs, 1575s, 1447m, 1422w, 1394w, 1367w, 1327w, 1280w, 1243m, 1205w, 1121w, 1094w, 983w, 939w, 841vs, 778w, 764w, 622w, 558s cm-1. UV/vis (MeCN): λmax (εmax) 273 (22600), 351 (7980), 584 (110) nm (dm3 mol-1 cm-1).

Crystals suitable for X-ray diffraction studies were grown by vapour diffusion of Et2O into a MeCN solution of [Cu2(L)(MeCN)2](PF6)2 at room temperature.
